# Supplementary material for: Comparison of the Spiritual Needs of Terminal Cancer Patients and Their Primary Family Caregivers
Source: PubMed Central journal article supplement — Hanguk Hosupisu Wanhwa Uiryo Hakhoe Chi. 2020 Jun 1;23(2):55–70. doi: 10.14475/kjhpc.2020.23.2.55 (PMC10332713; doi:10.14475/kjhpc.2020.23.2.55), 2020-06-01
Supplement: KJHPC-23-055_Supple.pdf [file KJHPC-23-055_Supple.pdf]

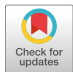

## 말기암환자와 가족의 영적요구 비교

강경아, 최영심\*

삼육대학교 간호대학, \*충남대학교 병원 호스피스센터

# Comparison of the Spiritual Needs of Terminal Cancer Patients and Their Primary Family Caregivers

Kyung-Ah Kang, R.N., Ph.D. and Youngsim Choi, R.N., M.S.\*

College of Nursing, Sahmyook University, Seoul, \*Palliative care nurse, Hospice Unit, Chungnam National University Hospital, Daejeon, Korea

**Purpose:** This study was conducted to examine differences in Spiritual Interests Related to Illness Tool (SpIRIT) scores and the degree of spiritual needs (SNs) between patients with terminal cancer and their primary family caregivers and to compare spiritual needs between them. **Methods:** The study participants were inpatients with terminal cancer and their primary family caregivers at 40 national hospice centers. The final analysis included 120 SpIRIT surveys from patients and 115 from family members, and 99 SNs questionnaires from patients and 111 from family members. Data analysis was conducted using descriptive statistics, the t-test, one-way analysis of variance, and Pearson correlation coefficients. **Results:** There were no significant between-group differences in SpIRIT scores or SNs. The SpIRIT sub-dimensions that ranked high for both patients and primary family caregivers were “maintaining positive perspective”, “loving others”, and “finding meaning”. The SNs sub-dimensions were ranked identically in both groups, in the order of “love and connection”, “hope and peace”, “meaning and purpose”, respectively. In both groups, the recognition of the importance of spiritual matters and religion were major factors influencing SpIRIT scores and SNs. **Conclusion:** The SpIRIT scores and degree of SNs of patients with terminal cancer and their primary family caregivers were found to be very closely related, and the needs for coherence and meaning were greater than religious needs. When providing spiritual care for patients with terminal illness, family members should also be considered, and their prioritization of spiritual needs and the importance of spiritual matters and religion shall be taken into account.

**Key Words:** Terminal care, Patient, Family, Spirituality, Needs assessment

**Received** December 19, 2019  
**Revised** February 7, 2020  
**Accepted** February 9, 2020

**Correspondence to**  
Kyung-Ah Kang  
ORCID: <https://orcid.org/0000-0002-3799-9554>  
E-mail: kangka@syu.ac.kr

This work was supported by the National Research Foundation of Korea (NRF) grant funded by the Korea government (MSIT) (2017R1A2B1009570).

## 서론

### 1. 연구의 필요성

영적안녕은 말기암환자와 가족들의 삶의 질, 긍정적 대처, 돌봄에 대한 만족도, 임종기 의사결정 등 건강돌봄결과의 주요 영향 요인이다[1,2]. 말기 암과 같은 생의 위협적인 상황에 직면할 때 영적요구는 증가하게 되며, 이 때 영적자원은 인간이 신체적, 심리적, 사회적으로 피할 수 없는 고통과 위기상황에 직면할 때 건강유지를 위한 핵심자원으로 기능한다[2,3].

인간은 신체적, 심리적, 영적자원이 서로 유기적으로 연결된 통합적 존재[4]일 뿐만 아니라, 환경과 지속적으로 상호작용하는 개방체계로서 말기암환자의 영적요구는 그들을 돌보는 가족들과 밀접히 연결되어 있어 보다 효과적인 영적돌봄을 위해서는 환자와 가족의 영적요구를 동시에 고려해야 할 필요가 있다. 가족은 환자의 회복에 직접적인 영향을 미치고, 질병에 대처하며, 치료과정의 어려움을 이겨내도록 촉진하는 환자돌봄을 위한 중요한 자원이다[5].

대상자의 보다 실제적인 영적요구 파악을 위해서는 돌봄 제공자 측면뿐 아니라, 돌봄 수혜자들이 그들의 질병과 관련하여 어떠한 영적관심을 가지고 있는지에 대한 요구파악이 수행되어야 한다[6]. Taylor [7]는 돌봄 수혜자 측면에서 말기암환자와 가족의 영적요구를 파악하기 위해서는, ‘요구(need)’라는 단어는 결핍이라는 의미를 내포하고 있어 부정적인 판단을 할 수 있으므로 ‘관심(interests)’이라는 용어 사용이 적절함을 시사하였다. 또한 말기환자와 가족의 영적관심은 상호 관련되어 있으므로 말기 환자의 영적요구사정에서 환자와 가족의 질병관련 영적관심을 동시에 사정해야 할 중요성을 제시하였고, 이의 측정을 위한 질병 관련 영적관심 도구(Spiritual Interests Related to Illness Tool, SpIRIT)를 개발하였다.

한편, 영적인 자원은 신체와 마음의 상태에 중요한 영향을 미치는 인간만이 가진 고유한 영역으로[8], 병의 진행과 함께 말기 환자의 관심은, ‘통증’ 문제로부터 ‘고통’의 문제로, 나아가서 ‘고통의 의미’, ‘인생의 의미’, ‘죽음의 의미’ 문제로 전개된다[9]. 기존에 개발된 보편적 영성특성을 고려한 영적요구 측정 도구들은 말기 환자의 특성을 고려한 구체적인 요구사정에 제한이 있다[10]. 또한 주로 서양문화권에서 개발된 도구로서, 영적인 문제가 가족, 환경, 문화의 영향을 받는 점을 고려할 때 한국문화의 특성에 부합된 도구로 대상자의 영적요구를 파악할 필요가 있다[11].

영적요구사정을 위해 다양한 도구들을 적용한 연구가 수행되었으나, 영적자원이 죽음이 가까운 말기환자와 가족들의 영적안녕을 위한 핵심건강자원이 됨을 고려할 때, 돌봄수혜자인 말기암환

자와 가족들의 측면에서 SpIRIT 점수를 동시에 측정하고, 한국 문화의 특성에 기반하여 개발된 도구로 그들의 영적요구(Spiritual Needs, SNs)를 비교분석한 연구는 수행되지 않았다. 또한 SpIRIT과 SNs 하위자원 중 말기암환자와 가족들의 우선적인 요구를 파악하고 비교하는 것은 말기암환자 돌봄현장에서 대상자 중심의 영적돌봄을 위해 필요한 작업이라고 본다.

### 2. 연구의 목적

본 연구에서는 말기암환자와 가족들의 영적요구를 파악하기 위하여, SpIRIT 점수와 SNs 정도를 비교, 분석함으로써, 대상자 중심의 영적돌봄을 수행하기 위한 기초자료를 제공하고자 한다. 구체적인 연구목적은 다음과 같다.

- 1) 말기암환자와 가족의 인구사회학적, 질병 및 영적요구 관련 특성을 파악한다.
- 2) 말기암환자와 가족의 인구사회학적, 질병 및 영적요구 관련 특성에 따른 SpIRIT 점수와 SNs 정도의 차이를 파악한다.
- 3) 말기암환자와 가족간의 SpIRIT 점수와 SNs 정도의 차이와 하위자원에 따른 순위를 파악한다.
- 4) 말기암환자와 가족의 SpIRIT과 SNs 하위자원의 상관관계를 파악한다.
- 5) 말기암환자와 가족의 SpIRIT과 SNs 에 영향을 미치는 요인을 파악한다.

## 대상 및 방법

### 1. 연구 설계

본 연구는 말기암환자와 가족들의 영적요구를 파악하기 위하여, 질병관련 영적관심(SpIRIT) 점수와 영적요구(SNs) 정도에 대한 차이를 확인하기 위한 비교조사연구이다.

### 2. 연구 대상

연구대상은 국가호스피스 전문기관 중 자료수집을 허락한 40개 기관에 입원중인 말기암환자와 가족으로서 연구 대상자 선정 기준은 다음과 같다: 1) 말기 암으로 진단받고 국가 호스피스 전문기관에 입원하고 있는 환자와 가족(주 돌봄제공자), 2) 연구에 참여할 것을 서면동의한 자, 3)질문지를 이해하고 응답할 수 있는 자. 연구대상자수는 G-power ver. 3.1 프로그램을 이용하여 본 연구의 주요분석방법이 t-test 양측검정으로 유의수준 0.05, 검정력 0.95, 효과크기 0.80 [10,11]을 기준으로 하였을 때, 군당 42명이 산출되어 본 연구에서 자료분석에 이용된 연구대상자수는 충분하다고 평가된다.

말기암환자와 가족의 취약한 신체적 특성으로 인한 탈락률과 설문응답의 정확성을 위해 설문지 문항수 및 기관의 여건에 따라 자료수집의 용이성을 고려한 편의표출에 의해 20개 기관씩 두 그룹으로 나누었다. 20개 기관에는 SpIRIT 설문지를 환자와 가족 각각 120부(각 기관당 환자와 가족 각각 6명씩)를 배부하였고, 나머지 20개 기관에도 동일하게 SNs 설문지를 배부하였다. SpIRIT을 배부한 20개 기관에서 회수한 설문지는 환자 120부, 가족 118부를 회수하였고, 최종 자료분석에 이용된 설문지는 환자 120부, 가족 115부이었다. SNs를 배부한 20개 기관에서 회수한 설문지는 환자 105부, 가족 114를 회수하였고, 최종 자료분석에 이용된 설문지는 환자 99부, 가족 111부이었다(Figure 1).

### 3. 연구 도구

#### 1) 대상자의 인구사회학적, 질병 및 영적요구 관련특성

SpIRIT과 SNs 도구를 적용한 대상자의 인구사회학적, 질병 및 영적요구 관련특성은 동일한 항목을 조사하였다. 말기암환자와 가족의 일반적 특성은 연령, 성별, 결혼상태, 가족관계(가족만), 교육수준, 종교, 가족 평균 월수입을 조사하였고, 질병관련특성은 진단명, 진단 후 경과기간, 질병으로 인해 느끼는 신체적/정신적/경제적 고통(5점 척도)이 있었다. 영적요구 관련 특성으로 영적문제와 종교 중요도(5점 척도), 영적지지자(다중응답)를 조사

하였다.

#### 2) 질병관련 영적관심

Taylor [7]가 말기암환자와 가족을 대상으로 그들의 질병관련 영적관심을 측정하기 위해 개발된 Spiritual Interests Related to Illness Tool (SpIRIT)을 개발자의 사용허락을 얻은 후 내용타당도 검증을 거친 후 사용하였다. 이 도구는 암환자와 가족의 요구를 동시에 측정할 수 있도록 개발된 점과 SpIRIT이란 ‘질병관련 영적관심 도구’로 결핍을 의미하는 ‘요구(needs)’ 대신 ‘관심(interests)’으로 표현함으로써 연구자의 의도하지 않은 대상자의 부정적인 판단으로 인한 평가를 방지할 수 있는 특징이 있다. 총 8개 하위차원-신과의 관계, 다른 사람들을 사랑함, 사랑과 영적 지지받기, 의미 찾기, 긍정적인 관점 유지, 죽음준비, 신념과 삶의 재평가, “왜?” 라고 묻기-의 42개 문항으로 구성되었으며 Likert 5점 척도로서 점수가 높을수록 질병관련 영적관심 정도가 높음을 의미한다. Taylor [7]의 연구에서 Cronbach’s  $\alpha=0.95$ 이었고, 본 연구에서 Cronbach’s  $\alpha=0.95$ 였다.

#### 3) 영적 요구

말기환자의 영적요구 측정을 위해서는 Yong 등[11]이 한국 성인 암환자를 대상으로 개발한 영적요구(spiritual needs, SNs) 측

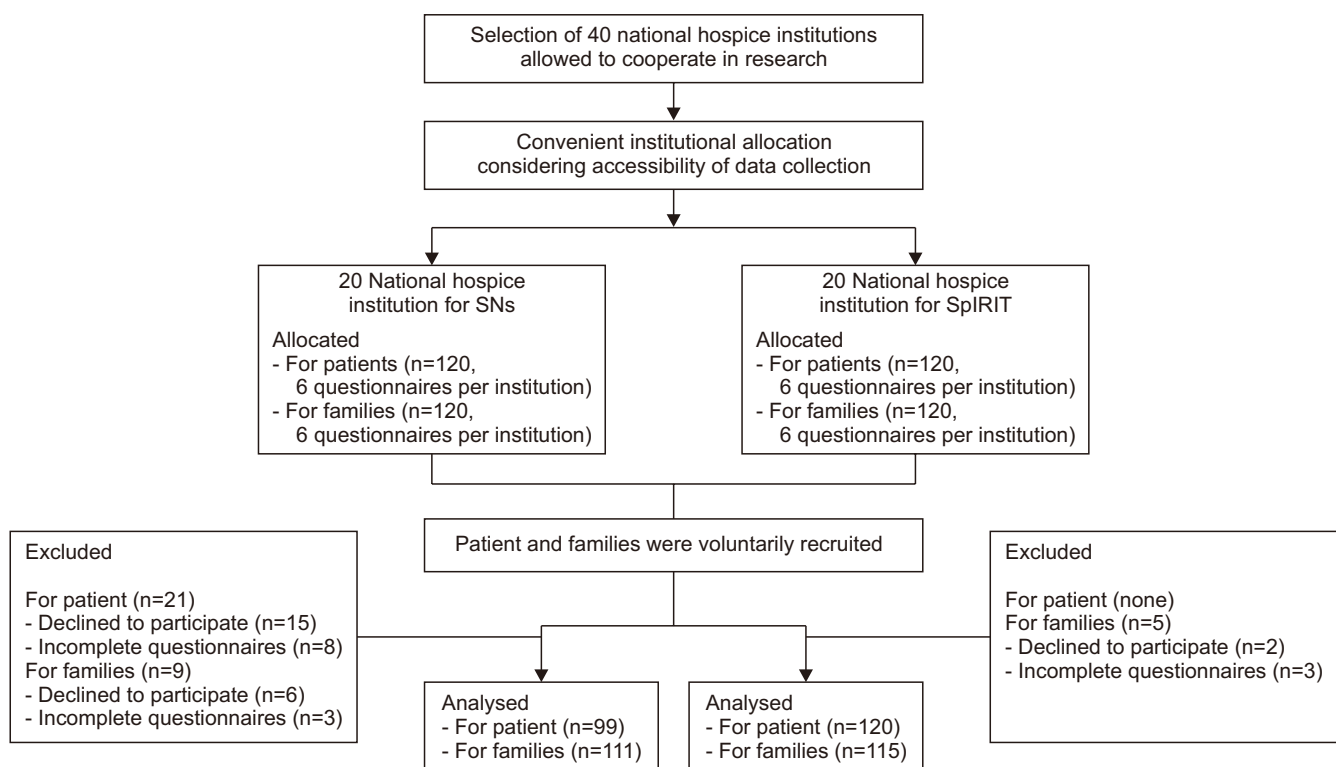

**Figure 1.** The sampling schema of the present study.  
SNs: spiritual needs, SpIRIT: spiritual interests related to illness tool.

정도구를 개발자의 사용허락을 얻은 후 사용하였다. 총 5개 하위차원(신과의 관계, 의미와 목적, 죽음의 수용, 희망과 평화, 사랑과 관계)에서 26개 문항으로 구성되었으며 Likert 5점 척도로서 점수가 높을수록 영적요구 정도가 높음을 의미한다. Yong

**Table 1.** Sociodemographic, Disease, and Spiritual-Related Characteristics of the Study Participants.

| Characteristics                                                            | Categories                       | Patients (N=226)       | Primary family caregivers (N=219) | t/ $\chi^2$ | P      |
|----------------------------------------------------------------------------|----------------------------------|------------------------|-----------------------------------|-------------|--------|
|                                                                            |                                  | N (%) or Mean $\pm$ SD | N (%) or Mean $\pm$ SD            |             |        |
| Sociodemographic characteristics                                           |                                  |                        |                                   |             |        |
| Age (yr)                                                                   |                                  | 64.06 $\pm$ 12.43      | 52.17 $\pm$ 15.29                 | 8.93        | <0.001 |
|                                                                            | <50                              | 26 (12.1)              | 86 (38.6)                         | 58.88       | <0.001 |
|                                                                            | 50~59                            | 56 (26.2)              | 64 (28.7)                         |             |        |
|                                                                            | 60~69                            | 56 (26.2)              | 48 (21.5)                         |             |        |
|                                                                            | $\geq$ 70                        | 76 (35.5)              | 25 (11.2)                         |             |        |
| Gender                                                                     | Female                           | 102 (46.8)             | 170 (75.6)                        | 40.51       | <0.001 |
|                                                                            | Male                             | 116 (53.2)             | 54 (24.0)                         |             |        |
| Marital status                                                             | Never married                    | 12 (5.5)               | 34 (15.3)                         | 27.99       | <0.001 |
|                                                                            | Married                          | 164 (75.2)             | 176 (79.3)                        |             |        |
|                                                                            | Separated/Divorced               | 18 (8.2)               | 5 (2.3)                           |             |        |
|                                                                            | Widowed/Bereaved                 | 24 (11.0)              | 7 (3.2)                           |             |        |
| Relationship with patients                                                 | Spouse                           | –                      | 91 (40.4)                         | –           | –      |
|                                                                            | Child                            | –                      | 66 (29.3)                         | –           | –      |
|                                                                            | Parent                           | –                      | 33 (14.7)                         | –           | –      |
|                                                                            | Other family                     | –                      | 35 (15.6)                         | –           | –      |
| Education level                                                            | Middle school                    | 57 (27.8)              | 29 (13.2)                         | 23.25       | <0.001 |
|                                                                            | High school                      | 96 (46.8)              | 95 (43.4)                         |             |        |
|                                                                            | Bachelor's degree                | 49 (23.9)              | 82 (37.4)                         |             |        |
|                                                                            | Graduate                         | 3 (1.5)                | 13 (5.9)                          |             |        |
| Religion                                                                   | Protestant                       | 70 (32.4)              | 69 (30.8)                         | 0.30        | 0.990  |
|                                                                            | Catholic                         | 35 (16.2)              | 37 (16.5)                         |             |        |
|                                                                            | Buddhist                         | 40 (18.5)              | 44 (19.6)                         |             |        |
|                                                                            | Other/None                       | 71 (32.9)              | 74 (33.0)                         |             |        |
| Average monthly income (chon won)                                          | <1,999                           | 86 (43.0)              | 66 (30.3)                         | 10.66       | 0.014  |
|                                                                            | 2,000~3,999                      | 80 (40.0)              | 91 (41.7)                         |             |        |
|                                                                            | 4,000~5,999                      | 24 (12.0)              | 39 (17.3)                         |             |        |
|                                                                            | >6,000                           | 10 (5.0)               | 22 (10.1)                         |             |        |
| Disease-related characteristics                                            |                                  |                        |                                   |             |        |
| Patient's diagnosis based on site of the primary cancer                    | Biliary and pancreatic cancer    | 33 (17.4)              | 35 (17.6)                         | –           | –      |
|                                                                            | Small and large intestine cancer | 29 (15.3)              | 26 (13.1)                         | –           | –      |
|                                                                            | Lung cancer                      | 25 (13.2)              | 39 (19.6)                         | –           | –      |
|                                                                            | Urogenital cancer                | 21 (11.1)              | 26 (13.1)                         | –           | –      |
|                                                                            | Liver cancer                     | 19 (10.0)              | 27 (13.6)                         | –           | –      |
|                                                                            | Stomach cancer                   | 19 (10.0)              | 17 (8.5)                          |             |        |
|                                                                            | Breast cancer                    | 13 (6.8)               | 10 (5.0)                          |             |        |
|                                                                            | Blood and lymphatic cancer       | 5 (2.6)                | 5 (2.5)                           |             |        |
|                                                                            | Brain and spinal cancer          | 2 (1.1)                | 5 (2.5)                           | –           | –      |
|                                                                            | Others                           | 24 (12.5)              | 14 (7.0)                          | –           | –      |
| Time since diagnosis (mo)                                                  |                                  | 38.79 $\pm$ 48.09      | 28.86 $\pm$ 32.72                 | 2.50        | 0.013  |
| Degree of suffering due to illness (or patient's illness) (5-point scale*) | Physical suffering               | 3.98 $\pm$ 1.14        | 3.38 $\pm$ 1.08                   | 5.63        | <0.001 |
|                                                                            | Psychological suffering          | 3.80 $\pm$ 0.92        | 3.77 $\pm$ 0.90                   | 0.32        | 0.746  |
|                                                                            | Economic suffering               | 3.24 $\pm$ 1.01        | 2.97 $\pm$ 0.94                   | 2.90        | 0.004  |

Table 1. Continued.

| Characteristics                                                               | Categories        | Patients (N=226)       | Primary family caregivers (N=219) | t / $\chi^2$ | P     |
|-------------------------------------------------------------------------------|-------------------|------------------------|-----------------------------------|--------------|-------|
|                                                                               |                   | N (%) or Mean $\pm$ SD | N (%) or Mean $\pm$ SD            |              |       |
| Spiritual needs-related characteristics                                       |                   |                        |                                   |              |       |
| How important are spiritual matters to you now? (5-point scale <sup>†</sup> ) |                   | 3.57 $\pm$ 1.10        | 3.50 $\pm$ 1.19                   | 0.70         | 0.486 |
| How important is religion to you now? (5-point scale <sup>†</sup> )           |                   | 3.56 $\pm$ 1.03        | 3.47 $\pm$ 1.26                   | 0.74         | 0.458 |
| Spiritual caregiver (multiple choice)                                         | Spouse            | 110 (50.7)             | 78 (34.8)                         |              |       |
|                                                                               | Parents           | 16 (7.4)               | 71 (31.7)                         |              |       |
|                                                                               | Children          | 101 (46.5)             | 63 (28.1)                         |              |       |
|                                                                               | Physicians        | 50 (23.0)              | 44 (19.6)                         |              |       |
|                                                                               | Nurses            | 55 (25.3)              | 40 (17.9)                         |              |       |
|                                                                               | Religious leaders | 99 (45.6)              | 68 (30.4)                         |              |       |
|                                                                               | Others            | 23 (10.6)              | 42 (18.8)                         |              |       |

\*1=not at all; 2=mild; 3=moderate; 4=severe; 5=very severe, <sup>†</sup>1=not at all; 2=a little bit; 3=some; 4=quite a bit; 5=a great deal.

등[11]의 연구에서 Cronbach's alpha=0.92였고, 본 연구에서 Cronbach's alpha=0.93이었다.

가족의 영적요구 측정을 위해서는 Yong 등[11]이 개발한 SNs를 암환자 가족의 영적요구를 측정하기에 적합한 내용으로 수정, 보완한 후 도구의 내용 타당도와 신뢰도를 검증한 도구를 사용하였다[12]. 호스피스 완화의료영역에 근무하는 전문간호사 4인과 간호학 교수 1인, 호스피스담당의 1인에게 내용타당도를 검증하였으며 각 문항의 CVI 계수는 80% 이상이였다. 총 26개 문항으로 구성되었으며 Likert 5점 척도로서 점수가 높을수록 영적요구 정도가 높음을 의미한다. Kang 등[12]의 연구에서 Cronbach's alpha=0.94였고, 본 연구에서 Cronbach's alpha=0.95였다.

#### 4. 자료 수집

본 연구는 S대학교 임상연구심의위원회의 승인(IRB-2017040HR)을 받은 후 전국 국가 호스피스 전문기관 중 자료수집을 허락한 40개 기관에 입원한 말기암환자와 가족을 대상으로 2017년 11월 5일부터 12월 28일까지 실시하였다. 연구자가 전국 호스피스 전문기관 협의회를 방문하여 연구의 취지를 설명한 후 협의회장의 안내로 해당기관의 동의와 협조를 얻었다. 연구참여에 동의한 기관의 호스피스팀장에게 연구의 목적과 취지에 대해 설명하였으며, 설문지는 연구참여기관에 우편으로 소정의 답례품과 함께 배송되었다. 설문진행은 각 기관 호스피스 팀장 또는 간호사가 환자의 신체적 상태를 고려하여 설문에 참여가능한 연구대상자에게 연구 목적과 자료수집 방법, 자료의 비밀보장을 설명하고 자발적으로 참여를 허락한 대상자에게 서면동의를 받고 설문지를 작성하도록 하였다. 설문지 작성 중 연구대상자가

원하지 않을 경우 언제라도 작성을 철회할 수 있음을 설명하였다. 작성된 설문지는 우편으로 회송되었다.

#### 5. 자료 분석

수집된 자료는 SPSS WIN Ver. 25.0 프로그램을 이용하여 분석하였다.

1. 대상자의 인구사회학적, 질병 및 영적요구 관련 특성과 연구변수의 정도는 백분율, 평균, 표준편차 등 기술통계로 분석하였다.
2. 대상자의 인구사회학적, 질병 및 영적요구 관련 특성에 따른 연구변수의 차이는 t-test, one-way ANOVA로 분석하였다.
3. 말기 환자와 가족간의 연구변수의 차이는 t-test로 분석하였다.
4. 말기 환자와 가족간의 연구변수 하위차원 간의 상관관계는 Pearson's correlation로 분석하였다.
5. 말기 환자와 가족의 연구변수에 영향을 미치는 요인은 Multiple regression으로 분석하였다.

## 결과

### 1. 대상자의 인구사회학적, 질병 및 영적요구 관련 특성

인구사회학적 특성을 살펴보면(Table 1), 환자와 가족간 유 의한 차이를 보인 특성은 연령(P<0.001), 성별(P<0.001), 결혼 상태(P<0.001), 교육수준(P<0.001), 가족 월수입(P=0.014)이었다. 환자와 가족의 평균연령은 환자가 가족보다 약 12세 정도 높았고, 환자군에서는 남성 53.2%, 여성 46.8%였고, 가족의 경우 여성 75.6%, 남성 24.0%이었으며, 환자와 가족 모두 결혼상

**Table 2.** Differences in SpRIT and SNs by Participants' Sociodemographic, Disease, and Spiritual Needs-Related Characteristics.

| Characteristics                         | SpRIT (5-point scale) |                  |                                   |                  | SNs (5-point scale) |                  |                                   |                  |
|-----------------------------------------|-----------------------|------------------|-----------------------------------|------------------|---------------------|------------------|-----------------------------------|------------------|
|                                         | Patients (N=120)      |                  | Primary family caregivers (N=115) |                  | Patients (N=99)     |                  | Primary family caregivers (N=111) |                  |
|                                         | Mean±SD               | t/F(P) (Scheffe) | Mean±SD                           | t/F(P) (Scheffe) | Mean±SD             | t/F(P) (Scheffe) | Mean±SD                           | t/F(P) (Scheffe) |
| <b>Sociodemographic characteristics</b> |                       |                  |                                   |                  |                     |                  |                                   |                  |
| Age (yr)                                |                       |                  |                                   |                  |                     |                  |                                   |                  |
| <50                                     | 3.99±0.39             | 1.37 (0.257)     | 3.91±0.49                         | 0.34 (0.807)     | 3.87±0.53           | 0.65 (0.583)     | 3.99±0.50                         | 0.36 (0.783)     |
| 50~59                                   | 3.75±0.41             |                  | 3.88±0.44                         |                  | 3.71±0.59           |                  | 4.10±0.53                         |                  |
| 60~69                                   | 3.70±0.52             |                  | 3.95±0.61                         |                  | 3.89±0.58           |                  | 4.06±0.71                         |                  |
| ≥70                                     | 3.89±0.69             |                  | 4.06±0.52                         |                  | 3.94±0.55           |                  | 3.91±0.81                         |                  |
| Gender                                  |                       |                  |                                   |                  |                     |                  |                                   |                  |
| Female                                  | 3.81±0.57             | 0.13 (0.901)     | 3.71±0.52                         | -2.71 (0.008)    | 3.92±0.57           | 0.91 (0.364)     | 3.97±0.44                         | -0.46 (0.650)    |
| Male                                    | 3.83±0.52             |                  | 4.00±0.47                         |                  | 3.82±0.56           |                  | 4.03±0.66                         |                  |
| Marital status                          |                       |                  |                                   |                  |                     |                  |                                   |                  |
| Never married <sup>a</sup>              | 3.61±0.54             | 0.10 (0.982)     | 3.72±0.45                         | 4.69 (0.004)     | 3.76±0.66           | 2.93 (0.025)     | 3.86±0.56                         | 0.47 (0.702)     |
| Married <sup>b</sup>                    | 3.82±0.51             |                  | 3.92±0.47                         | a,b<c            | 3.88±0.51           |                  | 4.05±0.64                         |                  |
| Separated/Divorced <sup>c</sup>         | 3.86±0.65             |                  | 5.00±0.00                         |                  | 3.65±0.57           |                  | 4.12±0.43                         |                  |
| Widowed/Bereaved <sup>d</sup>           | 3.84±0.68             |                  | 4.11±0.02                         |                  | 4.24±0.59           |                  | 4.08±0.47                         |                  |
| Relationship with patients              |                       |                  |                                   |                  |                     |                  |                                   |                  |
| Spouse                                  | -                     | -                | 3.95±0.57                         | 0.67 (0.578)     | -                   | -                | 4.02±0.66                         | 0.03 (0.993)     |
| Child                                   | -                     | -                | 3.84±0.44                         |                  | -                   | -                | 3.99±0.64                         |                  |
| Parent                                  | -                     | -                | 3.99±0.39                         |                  | -                   | -                | 4.04±0.55                         |                  |
| Other family                            | -                     | -                | 4.01±0.48                         |                  | -                   | -                | 4.03±0.57                         |                  |
| Education level                         |                       |                  |                                   |                  |                     |                  |                                   |                  |
| Middle school                           | 3.89±0.46             | 1.49 (0.221)     | 3.66±0.61                         | 2.20 (0.092)     | 3.84±0.57           | 0.25 (0.863)     | 3.85±0.95                         | 1.56 (0.205)     |
| High school                             | 3.74±0.56             |                  | 3.90±0.50                         |                  | 3.92±0.61           |                  | 4.01±0.51                         |                  |
| Bachelor's degree                       | 3.88±0.49             |                  | 3.95±0.48                         |                  | 3.83±0.45           |                  | 4.02±0.51                         |                  |
| Graduate                                | 4.40±0.20             |                  | 4.27±0.28                         |                  | 3.65±0.00           |                  | 4.46±0.41                         |                  |
| Religion                                |                       |                  |                                   |                  |                     |                  |                                   |                  |
| Protestant                              | 4.05±0.53             | 5.86 (<0.001)    | 4.18±0.44                         | 9.33 (<0.001)    | 4.15±0.41           | 10.58 (<0.001)   | 4.36±0.39                         | 6.44 (<0.001)    |
| Catholic                                | 4.00±0.45             |                  | 4.10±0.44                         |                  | 4.31±0.51           | a,b>d            | 4.14±0.57                         | a>c,d            |
| Buddhist                                | 3.60±0.47             |                  | 3.89±0.32                         |                  | 3.59±0.53           | a,b>c            | 3.87±0.57                         |                  |
| Other/None                              | 3.58±0.52             |                  | 3.58±0.45                         |                  | 3.57±0.53           |                  | 3.72±0.69                         |                  |
| Average monthly income (chon won)       |                       |                  |                                   |                  |                     |                  |                                   |                  |
| <1,999 <sup>a</sup>                     | 3.81±0.55             | 0.59 (0.623)     | 3.91±0.51                         | 3.60 (0.016)     | 3.87±0.64           | 0.19 (0.902)     | 4.06±0.69                         | 0.14 (0.939)     |
| 2,000~3,999 <sup>b</sup>                | 3.84±0.57             |                  | 3.80±0.49                         | b<d              | 3.84±0.49           |                  | 4.02±0.61                         |                  |
| 4,000~5,999 <sup>c</sup>                | 3.63±0.36             |                  | 4.01±0.49                         |                  | 4.00±0.49           |                  | 3.96±0.56                         |                  |
| >6,000 <sup>d</sup>                     | 3.79±0.41             |                  | 4.25±0.29                         |                  | 3.90±0.65           |                  | 4.07±0.35                         |                  |
| <b>Disease-related characteristics</b>  |                       |                  |                                   |                  |                     |                  |                                   |                  |
| Physical suffering                      |                       |                  |                                   |                  |                     |                  |                                   |                  |
| Not at all                              | 3.04±0.00             | 0.49 (0.782)     | 4.04±0.55                         | 0.96 (0.449)     | 3.79±0.48           | 0.83 (0.481)     | 4.02±0.21                         | 1.39 (0.241)     |
| Mild                                    | 3.86±0.55             |                  | 3.83±0.41                         |                  | 3.82±0.71           |                  | 4.01±0.66                         |                  |
| Moderate                                | 3.83±0.52             |                  | 3.83±0.46                         |                  | 3.81±0.51           |                  | 4.00±0.53                         |                  |
| Severe                                  | 3.79±0.59             |                  | 4.03±0.56                         |                  | 4.02±0.53           |                  | 3.89±0.74                         |                  |
| Very severe                             | 3.85±0.48             |                  | 4.00±0.46                         |                  | 3.87±0.57           |                  | 4.33±0.52                         |                  |

Table 2. Continued.

| Characteristics                         | SpRIT (5 scales) |                  |                                   |                  | SNs (5 scales)  |                  |                                   |                  |
|-----------------------------------------|------------------|------------------|-----------------------------------|------------------|-----------------|------------------|-----------------------------------|------------------|
|                                         | Patients (N=120) |                  | Primary family caregivers (N=115) |                  | Patients (N=99) |                  | Primary family caregivers (N=111) |                  |
|                                         | Mean±SD          | t/F(P) (Scheffe) | Mean±SD                           | t/F(P) (Scheffe) | Mean±SD         | t/F(P) (Scheffe) | Mean±SD                           | t/F(P) (Scheffe) |
| Psychological suffering                 | 3.77±1.03        | 1.12 (0.356)     | 4.28±0.53                         | 2.17 (0.096)     | –               | 1.15 (0.334)     | 3.98±0.03                         | 0.97 (0.427)     |
|                                         | 4.09±0.51        |                  | 3.87±0.52                         |                  | 4.12±0.60       |                  | 3.59±1.64                         |                  |
|                                         | 3.69±0.50        |                  | 3.93±0.42                         |                  | 3.76±0.70       |                  | 4.03±0.49                         |                  |
|                                         | 3.84±0.53        |                  | 3.84±0.48                         |                  | 3.84±0.48       |                  | 3.97±0.52                         |                  |
|                                         | 3.82±0.54        |                  | 3.92±0.49                         |                  | 3.40±0.51       |                  | 4.17±0.69                         |                  |
| Economic suffering                      | 3.49±0.54        | 2.04 (0.094)     | 3.78±0.44                         | 1.51 (0.203)     | 3.82±0.86       | 0.74 (0.587)     | 3.96±0.23                         | 0.23 (0.924)     |
|                                         | 3.94±0.40        |                  | 3.89±0.56                         |                  | 3.97±0.47       |                  | 4.10±0.62                         |                  |
|                                         | 3.88±0.57        |                  | 3.98±0.47                         |                  | 3.79±0.66       |                  | 3.98±0.69                         |                  |
|                                         | 3.64±0.53        |                  | 3.97±0.36                         |                  | 3.85±0.43       |                  | 4.11±0.59                         |                  |
|                                         | 3.82±0.54        |                  | 3.42±0.76                         |                  | 4.09±0.59       |                  | 3.99±0.45                         |                  |
| Spiritual needs-related characteristics |                  |                  |                                   |                  |                 |                  |                                   |                  |
| How important are                       | 3.02±0.31        | 19.51 (<0.001)   | 3.31±0.46                         | 21.34 (<0.001)   | 2.98±0.50       | 15.45 (<0.001)   | 2.88±1.22                         | 19.91 (<0.001)   |
| spiritual matters to                    | 3.38±0.51        | a,b,c,d<e        | 3.58±0.25                         | a,b,c,d<e        | 3.38±0.43       | a,b,c<e          | 3.57±0.46                         | a,b,c<e          |
| you now?                                | 3.63±0.46        | a,b<d            | 3.81±0.40                         | a,b<d            | 3.69±0.52       | a,b<d            | 3.87±0.38                         | a,b<d            |
|                                         | 3.92±0.39        |                  | 3.99±0.37                         | a<c              | 4.01±0.39       | a<c              | 4.12±0.40                         | a<c              |
|                                         | 4.34±0.35        |                  | 4.44±0.33                         |                  | 4.30±0.41       |                  | 4.46±0.39                         |                  |
| How important is                        | 3.31±0.76        | 18.66 (<0.001)   | 3.40±0.55                         | 14.61 (<0.001)   | 3.06±0.58       | 15.74 (<0.001)   | 3.08±1.11                         | 19.51 (<0.001)   |
| religion to you now?                    | 3.40±0.48        | a,b,c,d<e        | 3.65±0.48                         | a,b,c<e          | 3.35±0.44       | a,b,c<e          | 3.80±0.43                         | a,b,c<e          |
|                                         | 3.59±0.37        | b<d              | 3.76±0.36                         | a<d              | 3.68±0.51       | a,b<d            | 3.81±0.43                         | a<b,c,d          |
|                                         | 3.87±0.44        |                  | 4.00±0.33                         |                  | 4.02±0.36       |                  | 4.10±0.36                         |                  |
|                                         | 4.37±0.30        |                  | 4.31±0.40                         |                  | 4.31±0.43       |                  | 4.50±0.35                         |                  |

SNs: spiritual needs, SpRIT: spiritual interests related to illness tool.

태인 경우가 각각 75.2%, 79.3%로 가장 높은 비율을 보였다. 환자의 경우 고졸 46.8%, 중졸 27.8%, 대졸 23.9% 순이었으며, 가족은 고졸 43.4%, 대졸 37.4%, 중졸 13.2% 순이었다. 종교는 두 그룹 간 유의한 차이가 없었으며 환자와 가족 모두 기독교가 각각 32.4%, 30.8%로 가장 높은 비율을 차지하였다. 평균 가족 월수입은 환자군의 경우 200만원 미만 43.0%, 200~300만원 미만 40.0%였으며, 가족 응답자에서는 200~300만원 미만 41.7%, 200만원 미만 30.0% 순이었다.

질병관련 특성에서는, 환자의 진단명은 담도 및 췌장암이 가장 높은 빈도를 보였다. 암진단 후 경과기간은 환자와 가족그룹에서 유의한 차이가 있었다( $P=0.013$ ). 질병으로 인해 고통받는 정도에 대해 신체적, 정서적, 경제적 고통을 5점 척도로 질문한 결과 신체적 고통( $P<0.001$ )과 경제적 고통( $P=0.004$ ) 정도에서 환자와 가족군 간 유의한 차이를 보였다.

영적요구 관련 특성을 살펴보면, 영적문제가 얼마나 중요하십니까?(5점 척도)의 질문에서는 환자와 가족간 유의한 차이가 없었으나( $P=0.486$ ) 영적문제가 두 그룹 모두 5점척도에서 3.5 이상의 점수를 보였다. 종교가 얼마나 중요하십니까?(5점 척도)의 질문에서도 환자와 가족간 유의한 차이가 없었으나( $P=0.458$ ) 두

군 간 모두 3.47 이상의 점수를 보였다. 영적지지자에 대해 다중응답으로 조사한 결과, 환자군에서 영적 지지자로서 우선순위는 배우자 50.7%, 자녀 46.5%, 성직자 45.6%, 간호사 25.3%, 의사 23.0% 순의 비율을 보였고, 가족들이 영적지지자로 생각하는 경우는 배우자 34.8%, 부모 31.7%, 성직자 30.4%, 자녀 28.1%, 의사 19.6%, 간호사 17.9% 순이었다.

## 2. 대상자의 인구사회학적, 질병 및 영적요구 관련 특성에 따른 SpIRIT과 SNs의 차이

대상자의 인구사회학적, 질병관련, 영적요구 관련 특성 중에서 SpIRIT과 SNs에 모두 유의한 차이를 보인 항목은 종교( $P<0.001$ ), 영적문제의 중요도( $P<0.001$ ), 종교의 중요성( $P<0.001$ )이었다(Table 2). 사후검정결과, SNs에서 기독교나 카톨릭이 불교나 무교인 경우보다 영적요구정도가 유의하게 높았고, SpIRIT이나 SNs 모두에서 영적문제나 종교가 중요하다고 인식하는 그룹이 인식정도가 낮은 그룹들에 비해 질병에 대한 영적관심이나 영적요구 정도가 높았다.

그 외 가족들의 SpIRIT 정도에서 유의한 차이를 보인 특성은 성별( $P=0.008$ ), 결혼상태( $P=0.004$ ), 월수입( $P=0.016$ )이었고, 사

**Table 3.** Comparison of SpIRIT and SNs Sub-Dimensions between Patients and Their Primary Family Caregivers.

| Spiritual interests related to illness tool (5-point scale) |                  |      |                                   |      |        |       |
|-------------------------------------------------------------|------------------|------|-----------------------------------|------|--------|-------|
| Sub-dimensions                                              | Patients (N=120) |      | Primary family caregivers (N=115) |      | t      | P     |
|                                                             | Mean $\pm$ SD    | Rank | Mean $\pm$ SD                     | Rank |        |       |
| 1. Loving others (6 items)                                  | 4.05 (0.54)      | 1    | 4.13 (0.49)                       | 2    | -1.189 | 0.236 |
| 2. Maintaining positive perspective (5 items)               | 4.03 (0.61)      | 2    | 4.23 (0.60)                       | 1    | -2.549 | 0.011 |
| 3. Finding meaning (5 items)                                | 3.93 (0.61)      | 3    | 4.04 (0.48)                       | 3    | -1.538 | 0.125 |
| 4. Preparing for death (4 items)                            | 3.76 (0.72)      | 4    | 3.90 (0.55)                       | 5    | -1.687 | 0.093 |
| 5. Receiving love and spiritual support (6 items)           | 3.75 (0.66)      | 5    | 3.82 (0.62)                       | 6    | -0.771 | 0.441 |
| 6. Reevaluating beliefs and life (4 items)                  | 3.75 (0.68)      | 5    | 3.49 (0.67)                       | 8    | -2.838 | 0.005 |
| 7. Relating to God (9 items)                                | 3.71 (0.86)      | 7    | 3.75 (0.88)                       | 7    | -0.366 | 0.714 |
| 8. Asking "why?" (3 items)                                  | 3.51 (0.77)      | 8    | 3.92 (0.50)                       | 4    | 0.225  | 0.822 |
| Total (42 items)                                            | 3.82 (0.54)      |      | 3.92 (0.50)                       |      | -1.498 | 0.136 |
| Spiritual needs (5-point scale)                             |                  |      |                                   |      |        |       |
| Sub-dimensions                                              | Patients (N=99)  |      | Primary family caregivers (N=111) |      | t      | P     |
|                                                             | Mean $\pm$ SD    | Rank | Mean $\pm$ SD                     | Rank |        |       |
| Love and connection (2 items)                               | 4.14 (0.70)      | 1    | 4.30 (0.74)                       | 1    | -1.605 | 0.110 |
| Hope and peace (5 items)                                    | 3.98 (0.64)      | 2    | 4.17 (0.63)                       | 2    | -2.161 | 0.032 |
| Meaning and purpose (7 items)                               | 3.90 (0.64)      | 3    | 4.16 (0.66)                       | 3    | -2.817 | 0.005 |
| Acceptance of dying (7 items)                               | 3.82 (0.63)      | 4    | 3.88 (0.62)                       | 4    | -0.747 | 0.456 |
| Relationship with God (divine, sacred) (5 items)            | 3.68 (0.96)      | 5    | 3.74 (1.06)                       | 5    | -0.442 | 0.659 |
| Total (26 items)                                            | 3.87 (0.57)      |      | 4.01 (0.61)                       |      | -1.794 | 0.074 |

SNs: spiritual needs, SpIRIT: spiritual interests related to illness tool.

**Table 4.** Correlations among Sub-Dimensions of the SpRIT and SNs.

| Variables                                  | RG     | LO     | RLSS    | FM     | MPP     | PD     | RBL    | AW   |
|--------------------------------------------|--------|--------|---------|--------|---------|--------|--------|------|
|                                            | r(P)   | r(P)   | r(P)    | r(P)   | r(P)    | r(P)   | r(P)   | r(P) |
| SpRIT in patients (n=120)                  |        |        |         |        |         |        |        |      |
| RG                                         | 1      |        |         |        |         |        |        |      |
| LO                                         | 0.530* | 1      |         |        |         |        |        |      |
| RLSS                                       | 0.822* | 0.605* | 1       |        |         |        |        |      |
| FM                                         | 0.339* | 0.547* | 0.447*  | 1      |         |        |        |      |
| MPP                                        | 0.447* | 0.481* | 0.378*  | 0.358* | 1       |        |        |      |
| PD                                         | 0.616* | 0.615* | 0.719*  | 0.628* | 0.389*  | 1      |        |      |
| RBL                                        | 0.652* | 0.650* | 0.729*  | 0.657* | 0.381*  | 0.690* | 1      |      |
| AW                                         | 0.316* | 0.419* | 0.358*  | 0.615* | 0.235** | 0.447* | 0.585* | 1    |
| SpRIT in primary family caregivers (n=115) |        |        |         |        |         |        |        |      |
| RG                                         | 1      |        |         |        |         |        |        |      |
| LO                                         | 0.515* | 1      |         |        |         |        |        |      |
| RLSS                                       | 0.848* | 0.633* | 1       |        |         |        |        |      |
| FM                                         | 0.332* | 0.522* | 0.497*  | 1      |         |        |        |      |
| MPP                                        | 0.589* | 0.626* | 0.548*  | 0.511* | 1       |        |        |      |
| PD                                         | 0.495* | 0.505* | 0.594*  | 0.522* | 0.415*  | 1      |        |      |
| RBL                                        | 0.786* | 0.596* | 0.835*  | 0.534* | 0.523*  | 0.666* | 1      |      |
| AW                                         | 0.111  | 0.369* | 0.282** | 0.430* | 0.169   | 0.419* | 0.369* | 1    |
| SNs in patients (n=99)                     |        |        |         |        |         |        |        |      |
| RwG                                        | 1      |        |         |        |         |        |        |      |
| MP                                         | 0.567* |        | 1       |        |         |        |        |      |
| AD                                         | 0.488* |        | 0.627*  | 1      |         |        |        |      |
| HP                                         | 0.383* |        | 0.668*  | 0.640* | 1       |        |        |      |
| LC                                         | 0.426* |        | 0.499*  | 0.499* | 0.507*  | 1      |        |      |
| SNs in primary family caregivers (n=111)   |        |        |         |        |         |        |        |      |
| RwG                                        | 1      |        |         |        |         |        |        |      |
| MP                                         | 0.670* |        | 1       |        |         |        |        |      |
| AD                                         | 0.499* |        | 0.686*  | 1      |         |        |        |      |
| HP                                         | 0.479* |        | 0.746*  | 0.721* | 1       |        |        |      |
| LC                                         | 0.524* |        | 0.655*  | 0.644* | 0.669*  | 1      |        |      |

AD: acceptance of dying, AW: asking "why?", FM: finding meaning, HP: hope and peace, LC: love and connection, LO: loving others, MP: meaning and purpose, MPP: maintaining positive perspective, PD: preparing for death, RBL: reevaluating beliefs and life, RG: relating to God, RLSS: receiving love and spiritual support, RwG: relationship with God (divine, sacred), SNs: spiritual needs, SpRIT: spiritual interests related to illness tool. \*P<0.001, P<0.05.

후검정결과, 별거/이혼그룹이 미혼이나 기혼자에 비해, 월수입이 6백만원 이상의 그룹이 200~399만원 그룹에 비해 영적관심이 높았다.

### 3. 말기암환자와 가족의 SpIRIT, SNs의 차이 및 하위차원에 따른 순위

‘SpIRIT’에서 환자와 가족간의 유의한 차이는 없었다( $P=0.136$ ) (Table 3). 8개의 하위차원 중에서 말기암환자와 가족군에서 유

Table 5. Factors Influencing on SpIRIT and SNs.

| Predictors                                      | SpIRIT                                                                                               |       |         |                        |       |                                                                                                      |       |         |                        |       |
|-------------------------------------------------|------------------------------------------------------------------------------------------------------|-------|---------|------------------------|-------|------------------------------------------------------------------------------------------------------|-------|---------|------------------------|-------|
|                                                 | Patients (n=120)                                                                                     |       |         |                        |       | Primary family caregivers (n=115)                                                                    |       |         |                        |       |
|                                                 | B                                                                                                    | SE    | $\beta$ | t (P)                  | VIF   | B                                                                                                    | SE    | $\beta$ | t (P)                  | VIF   |
| Constant                                        | 3.684                                                                                                | 0.134 | -       | 27.589<br>( $<0.001$ ) | -     | 3.560                                                                                                | 0.121 | -       | 29.537<br>( $<0.001$ ) | -     |
| Gender D1 (female)                              | -0.116                                                                                               | 0.095 | -0.108  | -1.219<br>(0.226)      | 1.443 | 0.164                                                                                                | 0.080 | 0.145   | 2.050<br>(0.043)       | 1.175 |
| Marital status D1 (Never married)               | -0.100                                                                                               | 0.308 | -0.025  | -0.325<br>(0.081)      | 1.092 | 0.149                                                                                                | 0.103 | 0.107   | 1.445<br>(0.152)       | 1.287 |
| Marital status D2 (separated/divorced)          | -0.059                                                                                               | 0.163 | -0.028  | -0.361<br>(0.719)      | 1.149 | 0.727                                                                                                | 0.255 | 0.197   | 2.845<br>(0.005)       | 1.126 |
| Marital status D3 (widowed/bereaved)            | -0.031                                                                                               | 0.151 | -0.019  | -0.208<br>(0.836)      | 1.522 | 0.112                                                                                                | 0.268 | 0.030   | 0.418<br>(0.677)       | 1.237 |
| Family monthly income D1 (<1,999)               | -0.136                                                                                               | 0.098 | -0.124  | -1.393<br>(0.167)      | 1.467 | 0.153                                                                                                | 0.081 | 0.142   | 1.897<br>(0.061)       | 1.310 |
| Family monthly income D2 (4,000~5,999)          | -0.320                                                                                               | 0.134 | -0.199  | -2.387<br>(0.019)      | 1.289 | 0.318                                                                                                | 0.103 | 0.222   | 3.095<br>(0.003)       | 1.202 |
| Family monthly income D3 (>6,000)               | 0.136                                                                                                | 0.259 | 0.041   | 0.524<br>(0.602)       | 1.149 | 0.329                                                                                                | 0.116 | 0.223   | 2.824<br>(0.006)       | 1.458 |
| Religion D1 (Buddhist)                          | 0.006                                                                                                | 0.121 | 0.005   | 0.050<br>(0.960)       | 1.655 | 0.004                                                                                                | 0.104 | 0.003   | 0.038<br>(0.970)       | 1.559 |
| Religion D2 (None)                              | 0.174                                                                                                | 0.135 | 0.148   | 1.287<br>(0.201)       | 2.444 | -0.148                                                                                               | 0.101 | -0.143  | -1.460<br>(0.148)      | 2.249 |
| How important are spiritual matters to you now? |                                                                                                      |       |         |                        |       |                                                                                                      |       |         |                        |       |
| D1 (Not at all)                                 | -0.963                                                                                               | 0.374 | -0.337  | -2.575<br>(0.012)      | 3.155 | -0.747                                                                                               | 0.222 | -0.474  | -3.369<br>(0.001)      | 4.625 |
| D2 (A little bit)                               | -0.231                                                                                               | 0.145 | -0.148  | -1.594<br>(0.114)      | 1.591 | -0.210                                                                                               | 0.156 | -0.117  | -1.348<br>(0.181)      | 1.764 |
| D3 (Quite a bit)                                | 0.213                                                                                                | 0.160 | 0.193   | 1.333<br>(0.186)       | 3.854 | 0.002                                                                                                | 0.119 | 0.002   | 0.0018<br>(0.985)      | 3.075 |
| D4 (A great deal)                               | 0.396                                                                                                | 0.240 | 0.291   | 1.645<br>(0.103)       | 5.761 | 0.419                                                                                                | 0.183 | 0.335   | 2.289<br>(0.024)       | 5.017 |
| How important is religion to you now?           |                                                                                                      |       |         |                        |       |                                                                                                      |       |         |                        |       |
| D1 (Not at all)                                 | 0.279                                                                                                | 0.321 | 0.118   | 0.870<br>(0.387)       | 3.419 | 0.354                                                                                                | 0.233 | 0.216   | 1.520<br>(0.132)       | 4.733 |
| D2 (A little bit)                               | -0.232                                                                                               | 0.163 | -0.144  | -1.419<br>(0.159)      | 1.907 | 0.144                                                                                                | 0.137 | 0.101   | 1.054<br>(0.295)       | 2.136 |
| D3 (Quite a bit)                                | 0.145                                                                                                | 0.161 | 0.131   | 0.896<br>(0.373)       | 3.944 | 0.196                                                                                                | 0.118 | 0.179   | 1.657<br>(0.101)       | 2.741 |
| D4 (A great deal)                               | 0.450                                                                                                | 0.255 | 0.337   | 1.768<br>(0.080)       | 6.694 | 0.131                                                                                                | 0.164 | 0.115   | 0.798<br>(0.427)       | 4.853 |
| Statistics                                      | $R^2=.496$ , Adj $R^2=.404$<br>$F=5.389$ , $P<0.001$<br>Durbin-Watson' $d=1.961$ ( $1.867<d<2.133$ ) |       |         |                        |       | $R^2=.602$ , Adj $R^2=.529$<br>$F=8.280$ , $P<0.001$<br>Durbin-Watson' $d=1.821$ ( $1.867<d<2.133$ ) |       |         |                        |       |

Table 5. Continued.

| Predictors                                      | SNs                                                                                                            |       |         |                        |       |                                                                                                                |       |         |                        |       |
|-------------------------------------------------|----------------------------------------------------------------------------------------------------------------|-------|---------|------------------------|-------|----------------------------------------------------------------------------------------------------------------|-------|---------|------------------------|-------|
|                                                 | Patients (n=120)                                                                                               |       |         |                        |       | Primary family caregivers (n=115)                                                                              |       |         |                        |       |
|                                                 | B                                                                                                              | SE    | $\beta$ | t (P)                  | VIF   | B                                                                                                              | SE    | $\beta$ | t (P)                  | VIF   |
| Constant                                        | 3.823                                                                                                          | 0.159 | -       | 24.022<br>( $<0.001$ ) | -     | 3.903                                                                                                          | 0.198 | -       | 19.704<br>( $<0.001$ ) | -     |
| Gender D1 (female)                              | -0.169                                                                                                         | 0.093 | -0.150  | -1.811<br>(0.075)      | 1.242 | 0.020                                                                                                          | 0.119 | 0.014   | 0.168<br>(0.867)       | 1.220 |
| Marital status D1 (Never married)               | 0.059                                                                                                          | 0.179 | 0.027   | 0.332<br>(0.741)       | 1.199 | -0.046                                                                                                         | 0.144 | -0.028  | -0.323<br>(0.748)      | 1.273 |
| Marital status D2 (separated/divorced)          | -0.038                                                                                                         | 0.159 | -0.021  | -0.242<br>(0.810)      | 1.357 | 0.135                                                                                                          | 0.322 | 0.038   | 0.418<br>(0.677)       | 1.375 |
| Marital status D3 (widowed/bereaved)            | 0.202                                                                                                          | 0.174 | 0.092   | 1.161<br>(0.250)       | 1.134 | -0.091                                                                                                         | 0.257 | -0.029  | -0.355<br>(0.724)      | 1.160 |
| Family monthly income D1 (<1,999)               | 0.046                                                                                                          | 0.102 | 0.041   | 0.455<br>(0.650)       | 1.472 | 0.053                                                                                                          | 0.118 | 0.040   | 0.445<br>(0.657)       | 1.393 |
| Family monthly income D2 (4,000-5,999)          | 0.228                                                                                                          | 0.150 | 0.130   | 1.523<br>(0.133)       | 1.320 | 0.119                                                                                                          | 0.132 | 0.081   | 0.897<br>(0.372)       | 1.376 |
| Family monthly income D3 (>6,000)               | -0.110                                                                                                         | 0.181 | -0.054  | -0.609<br>(0.545)      | 1.413 | 0.054                                                                                                          | 0.197 | 0.024   | 0.274<br>(0.784)       | 1.313 |
| Religion D1 (Buddhist)                          | -0.377                                                                                                         | 0.136 | -0.241  | -2.767<br>(0.007)      | 1.369 | -0.124                                                                                                         | 0.176 | -0.082  | -0.704<br>(0.484)      | 2.281 |
| Religion D2 (None)                              | -0.195                                                                                                         | 0.142 | -0.168  | -1.367<br>(0.176)      | 2.706 | -0.136                                                                                                         | 0.167 | -0.107  | -0.815<br>(0.418)      | 2.897 |
| How important are spiritual matters to you now? |                                                                                                                |       |         |                        |       |                                                                                                                |       |         |                        |       |
| D1 (Not at all)                                 | -0.399                                                                                                         | 0.302 | -0.150  | -1.323<br>(0.190)      | 2.321 | -1.282                                                                                                         | 0.461 | -0.501  | -2.783<br>(0.007)      | 5.471 |
| D2 (A little bit)                               | -0.205                                                                                                         | 0.208 | -0.112  | -0.985<br>(0.328)      | 2.330 | -0.452                                                                                                         | 0.223 | -0.242  | -2.029<br>(0.046)      | 2.397 |
| D3 (Quite a bit)                                | 0.278                                                                                                          | 0.146 | 0.214   | 1.908<br>(0.061)       | 2.254 | 0.021                                                                                                          | 0.196 | 0.015   | 0.106<br>(0.916)       | 3.205 |
| D4 (A great deal)                               | 0.306                                                                                                          | 0.187 | 0.241   | 1.635<br>(0.107)       | 3.922 | 0.093                                                                                                          | 0.217 | 0.070   | 0.430<br>(0.668)       | 4.471 |
| How important is religion to you now?           |                                                                                                                |       |         |                        |       |                                                                                                                |       |         |                        |       |
| D1 (Not at all)                                 | -0.330                                                                                                         | 0.270 | -0.138  | -1.222<br>(0.226)      | 2.290 | 0.281                                                                                                          | 0.412 | 0.126   | 0.682<br>(0.497)       | 5.719 |
| D2 (A little bit)                               | -0.118                                                                                                         | 0.221 | -0.061  | -0.536<br>(0.594)      | 2.366 | 0.296                                                                                                          | 0.205 | 0.164   | 1.443<br>(0.153)       | 2.172 |
| D3 (Quite a bit)                                | 0.175                                                                                                          | 0.168 | 0.141   | 1.041<br>(0.302)       | 3.326 | 0.117                                                                                                          | 0.218 | 0.072   | 0.538<br>(0.592)       | 3.059 |
| D4 (A great deal)                               | 0.308                                                                                                          | 0.214 | 0.236   | 1.439<br>(0.155)       | 4.856 | 0.491                                                                                                          | 0.237 | 0.371   | 2.070<br>(0.042)       | 5.430 |
| Statistics                                      | R <sup>2</sup> =0.628, Adj R <sup>2</sup> =0.533<br>F=6.643, P<0.001<br>Durbin-Watson' d=2.100 (1.867<d<2.133) |       |         |                        |       | R <sup>2</sup> =0.502, Adj R <sup>2</sup> =0.401<br>F=4.978, P<0.001<br>Durbin-Watson' d=2.132 (1.867<d<2.133) |       |         |                        |       |

D: dummy variable (event), SE: standard error, SNs: spiritual needs, SplRIT: spiritual interests related to illness tool, VIF: variance inflation factor.

의한 차이를 보인 영역은 ‘긍정적인 관점 유지’(P=0.011), ‘신념과 삶의 재평가’(P=0.005)이었다. 반면 환자와 가족 모두에서 평균값이 높은 하위차원은 ‘긍정적인 관점 유지’, ‘다른 사람들을

사랑함’, ‘의미 찾기’ 순이었으며, 평균값이 낮은 영역은 ‘신과의 관계’가 환자와 가족 모두에서 7번째 순위이었다.

환자와 가족간 SNs 총 평균 간 차이를 보이지 않았다(P=0.074)

(Table 3). 말기암환자와 가족군에서 유의한 차이를 보인 하위차원은 ‘희망과 평화’ ( $P=0.032$ ), ‘의미와 목적’ ( $P=0.005$ )이었다. 환자와 가족의 영적요구 하위차원의 평균값은 ‘사랑과 관계’, ‘희망과 평화’, ‘의미와 목적’, ‘죽음의 수용’, ‘신과의 관계’ 순으로 말기암환자와 가족의 평균값의 순위가 동일하였다.

#### 4. 말기암환자와 가족의 SpIRIT과 SNs 하위차원의 상관관계

환자군에서 SpIRIT 하위차원 간의 상관관계의 범위는 0.235~0.822이었고 통계적으로 유의한 정적 상관관계를 보였다( $P<0.05$ ) (Table 4). 가족군에서 SpIRIT 하위차원 간의 상관관계는 ‘신과의 관계’와 ‘왜? 라고 묻기’, ‘긍정적인 관점 유지’와 ‘왜? 라고 묻기’ 간의 유의한 차이를 보이지 않았고, 그 외 모든 하위차원들은 유의한 정적 상관관계를 보였으며, 유의한 관계가 있는 하위차원 간 상관관계의 범위는 0.332~0.848이었다. SNs 하위차원 상관관계 분석결과, 환자군과 가족군에서 상관관계의 범위는 각각 0.383~0.668, 0.479~0.746이었고, 모두 통계적으로 유의한 정적 상관관계를 보였다( $P<0.001$ ).

#### 5. 말기암환자와 가족의 SpIRIT과 SNs에 영향을 미치는 요인

회귀분석을 실시하기 위하여, 종속변수의 자기상관은 Durbin-Watson 지수와 독립변수 간 다중공선성은 VIF 지수로 검정하였다. Durbin-Watson 지수는 모두 독립성 충족기준인  $d_L < d < d_U$  ( $1.867 < d < 2.133$ ) 사이에 있고 2에 가까워 자기상관 없이 독립성을 충족하였다. VIF 지수 또한 모두 10 미만으로 나타나 독립변수가 다중공선성이 없어 본 자료는 회귀분석을 실시하기에 적합하였다(Table 5).

SpIRIT에서는, 환자군에서 음의 영향력을 보인 요인은 영적 문제는 ‘전혀 중요하지 않다’ ( $\beta = -0.337$ ,  $P=0.012$ ), 가족월수입 400~600만원( $\beta = -0.199$ ,  $P=0.019$ ) 순이었고, 이들 변수가 SpIRIT를 설명하는 설명력은 40.4%이었다. 가족군에서는 양의 영향력보인 변수는 영적문제가 ‘매우 중요하다’ ( $\beta = 0.335$ ,  $P=0.024$ ), 가족월수입 600만원 이상( $\beta = 0.223$ ,  $P=0.006$ ), 400~600만원( $\beta = 0.222$ ,  $P=0.003$ ), 별거 또는 이혼( $\beta = 0.197$ ,  $P=0.005$ ), 여자( $\beta = 0.145$ ,  $P=0.043$ ) 순이었고, 음의 영향력을 보인 변수는 영적문제는 ‘전혀 중요하지 않다’ ( $\beta = -0.474$ ,  $P=0.001$ )이었고, 이들 변수의 설명력은 52.9%이었다.

SNs에서는, 환자군에서 종교가 불교에서( $\beta = -0.241$ ,  $P=0.007$ ) 음의 영향력을 보였고, 설명력은 53.3%이었다. 가족군에서는 영적문제는 ‘전혀 중요하지 않다’ ( $\beta = -2.783$ ,  $P=0.007$ ), ‘약간 중요하다’ ( $\beta = -2.029$ ,  $P=0.046$ ) 순으로 음의 영향력을 보였고, 종교가 ‘매우 중요하다’ ( $\beta = 2.070$ ,  $P=0.042$ ) 요인은 양의 영향력을 보였으며 이들 변수의 설명력은 40.1%이었다.

## 고찰

본 연구에서 말기암환자와 가족들의 영적요구를 파악하기 위하여, 말기암환자와 가족의 질병관련 영적관심도구(SpIRIT)와 한국문화권에서 암환자를 대상으로 개발된 영적요구(SNs) 도구를 사용하여 비교분석된 결과를 토대로 대상자 요구중심의 영적사정과 중재방향을 모색하고자 한다.

말기암환자와 가족의 인구사회학적, 질병 및 영적요구 관련 특성을 파악한 결과에서는, 질병으로 인한 신체적, 정서적, 경제적 고통의 정도에서 정서적 고통과 영적문제와 종교의 중요성은 환자와 가족군 모두 유의한 차이가 없었고, 평균값이 높았다. 이러한 점은 호스피스 완화의료 영역에서 환자를 위한 신체적 돌봄 뿐 아니라 말기 환자와 가족을 포함한 정서적, 영적돌봄이 중요한 비중으로 고려되어야 할 필요가 있음을 시사하는 결과라고 본다. 북부유럽에 거주하는 285명의 암환자를 대상으로 암 진행단계별 영적요구 영향요인을 조사한 결과, 실존적 요구, 내적평안, 사랑을 줌 등에 관한 영적요구에 불안이 가장 유의한 영향인자가 보고되었다[13]. 더욱이, 불치의 질병으로 인한 고통은 신체적 고통 이상의 정서적 영적고통이 중요한 문제로 동반됨이 보고되어[14], 미주 및 유럽권의 연구결과에서도 본 연구와 동일한 결과가 확인되었다.

영적지지자로 환자와 가족 모두 가족이나 성직자에 응답한 비율이 높았으나 간호사 의사 또한 영적지지자로 응답한 비율이 약 20% 응답률을 보여 말기암환자와 가족들이 호스피스 완화의료 팀원(이하 호완팀)들에게 영적지지자로서의 역할을 원하고 있음이 확인되었다. 호완팀들에 의한 영적돌봄은 죽음을 앞두고 있는 대상자들에게 필수적인 부분으로서[6,14], 이를 위한 첫 단계로 호완팀들이 대상자의 충족되지 않은 영적요구를 정확히 사정할 수 있는 역량이 준비되어야 한다고 본다. 그외, 기독교와 가톨릭 신자가 불교와 무교인 사람보다 영적요구가 높게 확인되었고, 영적문제와 종교에 대한 중요성 인식이 높을수록 영적관심과 요구도 높게 나타났으며, 회귀분석 결과, 환자와 가족군 모두에서 영적문제와 종교에 대한 중요성은 SpIRIT과 SNs의 주요 영향요인이 파악되었다. 본 연구가 40개 국가지정 호스피스 전문기관에 입원한 환자와 그 가족들을 대상으로 조사된 결과라는 점을 고려할 때, 영적사정 시에 종교유무, 종교의 종류, 영적문제 및 종교의 중요성 인식여부를 핵심적인 사정내용으로 반영할 수 있겠다.

환자와 가족의 SpIRIT과 SNs는 유의한 차이를 보이지 않았고, 총 평균에서 가족이 환자보다 질병관련 영적관심과 영적요구가 환자보다 높게 나타났다. 한국문화권에서 Taylor [7] 도구를 적용하여 말기암환자 가족과 암환자의 영적요구를 분석한 결과에

서도[5] 암환자와 가족의 영적요구 점수의 문항평균간 유의한 차이를 보이지 않아 환자와 가족의 영적요구가 서로 밀접하게 연결되어 있음을 알 수 있다. 환자와 가족의 고통과 영적관심은 서로 관련되어 있다는 Ross와 Austin [14]의 연구결과와 생의 말기에 직면한 환자와 가족들은 영적, 존재론적 요구를 가지고 있으며 이에 대한 의료팀의 돌봄가이드가 필요함을 제시한 보고[15]에서도 본 연구결과와 일치되고 있는 점을 확인할 수 있다.

영성은 인간됨의 본질로서, 초월적 가치를 추구하고, 삶의 의미와 목적을 찾으며, 용서와 사랑의 관계 속에서 평화와 희망이 충만한 삶을 이루려는 영의 외적 표현이다[16]. 이러한 영성의 속성에 기초하여 영적요구는 존재의 의미와 목적을 추구하려는 '의미'적 요구, 사랑과 용서를 주고받고자 하는 '상호관련성'에 대한 요구, 희망과 초월적 가치를 추구하고자 하는 '종교 및 초월'적 요구가 있다[9]. 본 연구에서 SpIRIT과 SNs 2개의 도구를 각각 20개 기관씩 총 40개 국가 호스피스 전문기관에 입원한 말기 암환자와 그 가족을 대상으로 조사하여, 환자와 가족 모두 '상호관련성', '의미', '종교 및 초월적 요구'로 우선순위가 확인된 결과는 그 시사하는 점이 매우 크다고 본다. 즉, 호완팀은 말기 환자와 가족의 영적돌봄을 위해 그들의 요구를 사정할 때 용서와 화해, 사랑을 주고받음 등의 '상호관련성'의 요구 충족을 '종교적/초월적 요구'보다 우선적으로 고려해야 할 필요가 있겠다. '의미' 발견에 대한 요구 또한 '종교적/초월적 요구'보다 높게 나타난 점은 영적사정의 '의미' 발견에 대한 부분이 중요한 영역으로 반영되어야 하는 근거자료가 된다고 본다. Hocker 등[13]의 연구에서 암환자의 영적요구를 실존적(existential needs), 내적평안(inner peace), 적극적 나눔(actively giving), 종교적 요구(religious needs)의 네 영역에서 확인한 결과 종교가 있는 그룹과 없는 그룹 모두에서 적극적 나눔과 내적평안에 대한 영적요구가 높았으며 종교적 요구는 종교가 있는 그룹에서는 세 번째로, 없는 그룹에서는 가장 낮은 평균값을 보였다. 또한 불안은 실존적, 내적평안, 적극적 나눔 영적요구에 가장 유의한 영향인자였으며, 긴밀한 연결성(coherence)은 내적평안, 종교적 요구, 적극적 나눔에 유의한 영향요인으로 보고된 결과는 본 연구와 유사한 결과를 보였다. 또한 말기암환자 18명에게 질적연구를 통해 그들의 영적요구를 확인한 Hatamipour 등의 연구에서도[17] 내용분석결과 확인된 4개의 주제는 connection, peace, meaning and purpose, transcendence로 나타나 본 연구와 유사한 결과가 보고되었다. 이상의 연구결과를 근거로 말기암환자와 가족들은 호완팀원들에게 진정성에 기반한 돌봄관계, 내면적 안정과 희망을 고취시키는 영적돌봄을 원하고 있음[18]을 나타내는 것이라고 본다. 또한 호완팀 특히 간호사들이 말기 환자와의 진정성에 기반한 관계를 통해 대상자의 실존적 문제로 인한 고통경감의 촉진자 역할을 해야

할 중요성[19,20]을 제시하고 있다고 본다. 호스피스 완화의료 현장에서 호완팀에 의해 수행되는 영적돌봄은 인간의 영성에 근거한 요구를 충족하는 돌봄이 되어야 하겠다. 또한 본 연구를 통해 사랑을 주고받는 '상호관련성', '의미' 발견에 대한 실존적, 관계적 요구사정과 중재의 필요성에 대한 근거가 제시되었다고 본다. 영적사정 관련 문헌에 관한 통합적 고찰 결과[21]에서도 영성의 속성에 기반한 보다 실제적인 영적사정이 대상자의 요구에 따라 단계적으로 수행될 필요가 있음이 보고되었다. 또한 환자와 가족들은 이러한 영적관심과 요구를 민감한 정서상태, 대화를 원하는 표정이나 몸짓, 사적인 공간에서의 면담, 조용한 사적인 공간에 대한 요구 등 다양한 방법으로 표현한다[18,22]. 따라서 민감하게 그들의 영적요구를 보다 효과적으로 파악하기 위한 영적사정, 공감 및 상담 역량이 호완팀에게 매우 필요하다고 본다.

말기암환자와 가족의 질병관련 영적관심, 영적요구 하위차원의 상관관계를 파악한 결과, SpIRIT과 SNs의 하위차원 간 상관관계가 대부분 0.3~0.7 사이의 범위에 있었다. 문항 간 또는 하위차원 간 상관관계는 0.3~0.8 범위에 있을 때 내적 일관성이 있다고 볼 수 있다[23,24]. 따라서 본 연구에 사용된 SpIRIT과 SNs는 내적 일관성이 우수한 측정도구라고 평가된다.

본 연구는 한국 호스피스 전문기관을 전수조사 하지 못한 제한점이 있으나 국가지정 40개 호스피스 전문기관에 입원한 말기암 환자와 가족을 대상으로 하였다. 본 연구가 기존의 영적요구도를 파악한 선행연구들과 차별된 점은 첫째, 환자와 가족을 동일한 측정도구를 사용하여 그들의 SpIRIT 점수와 SNs 정도를 분석하였고, 둘째는 돌봄수혜자 측면에서 그들의 질병관련 영적관심을 확인하고, 또한 한국문화권에서 개발된 도구로 환자와 가족의 영적요구를 확인하였다는 데 있다. 본 연구에서, 암환자와 가족들의 영적요구는 서로 밀접하게 관련되어 있으며, '상호관련성', '의미'적 영적요구가 종교적 요구보다 높음이 확인되었고, 환자보다 가족의 SpIRIT과 SNs의 평균값이 높게 나타났다. 이러한 결과는 말기 환자뿐 아니라 가족의 영적돌봄 계획을 위한 중요한 근거자료로 활용될 수 있겠다.

## 요약

**목적:** 본 연구는 말기암환자와 가족의 질병관련 영적관심(SpIRIT) 점수와 영적요구(SNs) 정도에 대한 차이를 확인하여, 말기암환자와 가족들의 영적요구를 비교하기 위한 조사연구이다.

**방법:** 대상자는 국가지정 40개 호스피스 전문기관에 입원중인 말기 암환자와 가족이다. 20개 기관에는 SpIRIT을 적용하였고 최종 자료 분석에 사용된 설문지는 환자 120부, 가족 115부이었다. 다른 20개 기관에는 SN을 적용하였고, 환자 99부, 가족 111부 설문지가 최종

자료분석에 사용되었다. 자료분석은 SPSS win 25 프로그램을 이용, 서술통계, t-test, one-way ANOVA, Pearson's correlation으로 분석하였다.

**결과:** SpIRIT에서 환자와 가족간의 유의한 차이는 없었다. 환자와 가족 모두에서 평균값이 높은 하위차원은 '긍정적인 관점 유지', '다른 사람들을 사랑함', '의미 찾기' 순이었고, 평균값이 낮은 영역은 '신과의 관계'이었다. SNs에서 환자와 가족간의 유의한 차이는 없었다. 환자와 가족의 영적요구 하위차원은 '사랑과 관계', '희망과 평화', '의미와 목적', '죽음의 수용', '신과의 관계'로 평균값 순위가 동일하였다. 환자와 가족군 모두에서 영적문제와 종교의 중요성 인식은 SpIRIT과 SNs의 주요 영향요인이었다.

**결론:** 말기암환자와 가족들의 질병관련 영적관심과 영적요구는 매

우 밀접하게 관련되어 있으며, '상호관련성', '의미'적 요구가 '종교 및 초월'적 요구보다 더 높았다. 말기환자와 가족을 위한 영적돌봄을 수행할 때에, 가족을 동시에 고려해야 하며, 그들의 영적요구의 우선 순위와 영적문제와 종교의 중요성을 고려해야 할 필요가 있겠다.

**중심단어:** 호스피스 완화의료, 환자, 가족, 영성, 요구사정

## CONFLICT OF INTEREST

No potential conflict of interest relevant to this article was reported.

## REFERENCES

1. Borneman T, Brown-Saltzman K. Meaning in illness. In: Ferrell BR, Coyle N, Paice JA, eds. Oxford textbook of palliative nursing. 4th ed. New York:Oxford University Press;2015. p. 554-63.
2. McClement SE. Spiritual issues in palliative medicine. In: Cherry NI, Fallon MT, Kaasa S, Portenoy RK, Currow DC, eds. Oxford textbook of palliative medicine. 5th ed. New York:Oxford University Press;2015. p. 1060-6.
3. Frankl VE. Man's search for meaning. Boston:Beacon Press;c2006.
4. Delgado-Guay MO. Spiritual care. In: Bruera E, Higginson I, von Gunten CF, Morita T, eds. Textbook of palliative medicine and supportive care. 2nd ed. Boca Raton:CRC Press;2016. p. 1055-62.
5. Cho JH. Spiritual needs of family caregivers of patients with cancer [master's thesis]. Seoul: Yonsei Univ.; 2008. Korean.
6. Hermann CP. The degree to which spiritual needs of patients near the end of life are met. Oncol Nurs Forum 2007;34:70-8.
7. Taylor EJ. Prevalence and associated factors of spiritual needs among patients with the cancer and family caregivers. Oncol Nurs Forum 2006;33:729-35.
8. Cobb M, Puchalski CM, Rumbold B. Spirituality in healthcare, Korean translation. Seoul:The Catholic University of Korea Press;2016.
9. Kang KA, Kim DB. Spiritual care. In: Korean Society for Hospice and Palliative Care. Textbook of hospice & palliative care. Paju:Koonja;2018. p. 449-67.
10. Doyle N, Henry R. Holistic needs assessment: rationale and practical implementation. Cancer Nurs Pract 2014;13:16-21.
11. Yong J, Kim J, Han SS, Puchalski CM. Development and validation of a scale assessing spiritual needs for Korean patients with cancer. J Palliat Care 2008;24:240-6.
12. Kang KA, Choi YS, Kim YJ. Reliability and validity of an instrument assessing spiritual needs of families of terminal cancer patients. Korean J Hosp Palliat Care 2018;21:144-51.
13. Hocker A, Krull A, Koch U, Mehnert A. Exploring spiritual needs and their associated factors in an urban sample of early and advanced cancer patients. Eur J Cancer Care 2014;23:786-94.
14. Ross L, Austin J. Spiritual needs and spiritual support preferences of people with end-stage heart failure and their carers: implications for nurse managers. J Nurs Manag 2015;23:87-95.
15. Sinclair S, Chochinov HM. Communicating with patients about existential and spiritual issues: SACR-D work. Prog Palliat Care 2012;20:72-8.
16. Darby K, Nash P, Nash S. Understanding and responding to spiritual and religious needs of young people with cancer. Cancer Nurs Pract 2014;13:32-7.
17. Hatamipour K, Rassouli M, Yaghmaie F, Zendedel K, Majd HA. Spiritual needs of cancer patients: a qualitative study. Indian J Palliat Care 2015;21:61-7.
18. Tan H, Wilson A, Olver L, Barton C. The family meeting addressing spiritual and psychosocial needs in a palliative care setting: usefulness and challenges to implementation. Prog Palliat Care 2011;19:66-72.
19. Keall R, Clayton JM, Butow P. How do Australian palliative care nurses address existential and spiritual concerns? Facilitators, barriers and strategies. J Clin Nurs 2014;23:197-205.
20. Nixon A, Narayanasamy A. The spiritual needs of neuro-oncology patients from patients' perspective. J Clin Nurs 2010;19:2259-370.

21. Draper P. An integrative review of spiritual assessment: implications for nursing management. *J Nurs Manag* 2012;20:970-80.
22. Hodge DR. Administering a two-stage spiritual assessment in healthcare settings: a necessary component of ethical and effective care. *J Nurs Manag* 2015;23:27-38.
23. Pett MA, Lackey NR, Sullivan JJ. Making sense of factor analysis. Thousand Oaks, CA:Sage, cop.;2003. p.167-206.
24. Blaber M, Jone J, Willis D. Spiritual care: which is the best assessment tool for palliative settings? *Int J Palliat Nurs* 2015;21:430-8.
